# Supplementary material for: Antitumor and antioxidant activities of purple potato ethanolic extract and its interaction with liposomes, albumin and plasmid DNA
Source: Royal Society of Chemistry journal article supplement (doi:10.1039/d0fo01667e), 2020-12-17
Supplement: d0fo01667e1.pdf [file d0fo01667e1.pdf]

## SUPPLEMENTARY MATERIALS

### Antioxidant and pro-apoptotic activities of purple potato extract and its interaction with liposomes, albumin and plasmid DNA

Paulina Strugała,<sup>\*a</sup> Anna Urbaniak,<sup>b,c</sup> Patryk Kuryś,<sup>a</sup> Aleksandra Włoch,<sup>a</sup> Teresa Kral,<sup>a,d</sup> Maciej Ugorski,<sup>c</sup> Martin Hof,<sup>d</sup> and Janina Gabrielska<sup>a</sup>

<sup>a</sup>Department of Physics and Biophysics, Wrocław University of Environmental and Life Sciences, C. K. Norwida 25, 50-375 Wrocław, Poland. E-mail: paulina.strugala@upwr.edu.pl

<sup>b</sup>Laboratory of Glycobiology, Ludwik Hirszfeld Institute of Immunology and Experimental Therapy, Polish Academy of Sciences, Rudolfa Weigla 12, 53-114 Wrocław, Poland

<sup>c</sup>Department of Biochemistry and Molecular Biology, Faculty of Veterinary Medicine, Wrocław University of Environmental and Life Sciences, C. K. Norwida 31, 50-375, Wrocław, Poland

<sup>d</sup>Department of Biophysical Chemistry, J. Heyrovsky Institute of Physical Chemistry of the Czech Academy of Sciences, Dolejskova 3, 18223 Prague 8, Czech Republic

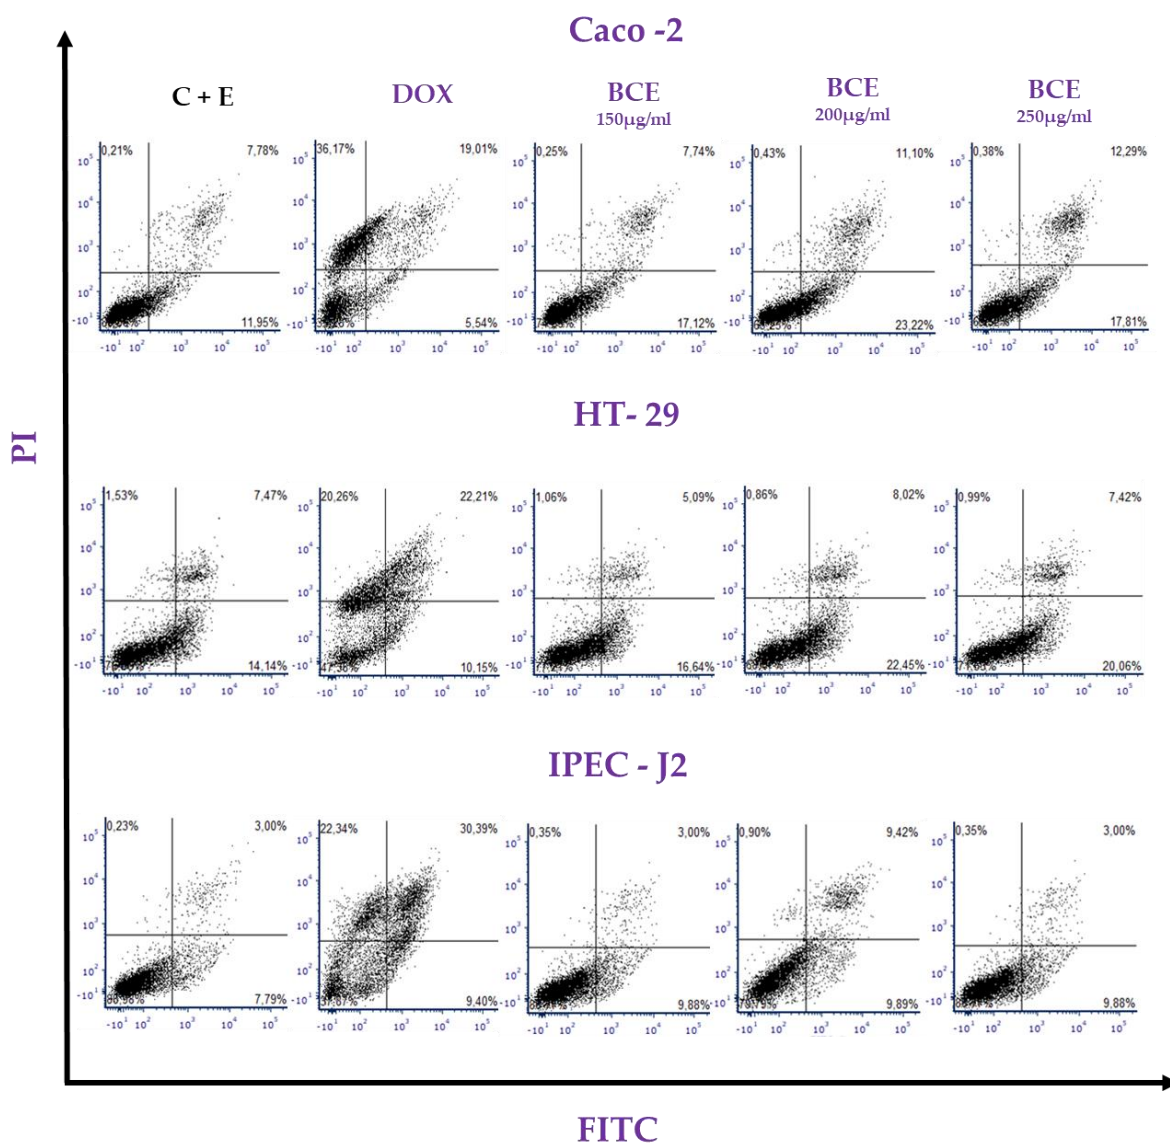

**Fig. S1** Sensitivity of Caco-2 cells, HT-29 cells and IPEC-J2 cells treated with 150, 200 and 250 µg/ml of Blue Congo Extract (BCE) or 4 µM doxorubicin (DOX) to apoptosis. Cellular response measured by staining with Annexin V and propidium iodide (PI). Flow cytometry dot plots show percentage of early apoptotic cells (Annexin V<sup>+</sup>, lower right), late apoptotic cells (Annexin V<sup>+</sup>/PI<sup>+</sup>, upper right) and necrotic cells (Annexin V<sup>-</sup>, PI<sup>+</sup>, left right) . Data are represented as mean ± SD (n = 4). Statistically significant differences (\**p*<0,05, \*\**p*<0.01, \*\*\**p*<0.001). Control C + E – cells growing in complete medium and 50% ethanol.
